# Supplementary material
Source: Springer Nature journal article supplement (https://www.springermedizin.de/resource/supplementary/12985_2010_967_MOESM6_ESM.pdf/9608846)

*S. cerevisiae*  
Lambda ladder  
CvV-BW1  
CvV-BW2  
CvV-BW3  
CvV-BW4

450 kb ———▶  
437 kb ———  
388 kb ———  
365 kb ———▶  
340 kb ———  
291 kb ———  
285 kb ———▶

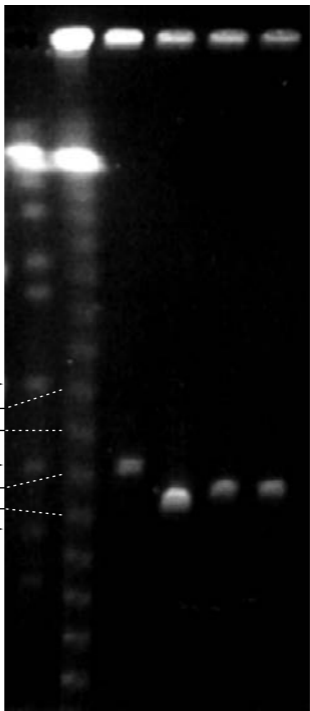

Supplement: MOESM6 [file 9608846]
